# Supplementary material for: Phytophthora sojae Avirulence Effector Avr3b is a Secreted NADH and ADP-ribose Pyrophosphorylase that Modulates Plant Immunity
Source: PLoS Pathog. 2011 Nov 10;7(11):e1002353. doi: 10.1371/journal.ppat.1002353 (PMC3213090; doi:10.1371/journal.ppat.1002353)
Supplement: Table S8 — Primers used in this study. (XLS) [file ppat.1002353.s011.xls]

## Sheet: Table S7
Primer Name	Sequence	Function
Avh_307-SPF-BamHI	atGGATCCATGGAGGCTGCTGAATCGGCTG	Avr3b P6497 and P7076 allele construct for soybean cobombardment (without signal peptide)
Avh_307R-SphI	atGCATGCCTAATTAAACAACAATCGTACTG	Avr3b P6497 allele construct for soybean cobombardment
Avh_307R2-SphI	atGCATGCTTACCGTACCCCTCCTTCTC	Avr3b P7076 allele construct for soybean cobombardment
pFF19-3bNdx-F	ctaggatccATGGGTCGTAGCGTGGTATGCAATG	Avr3b deletion mutant (16-174 a.a.) for soybean cobombardment
pFF19-3bW-R	ctagcatgcCTATACCACGCTACGACCG	Avr3b deletion mutant (170-315 a.a.) for soybean cobombardment
Avh_307RTF	GGTGACAAGACTTACGAATCC	Avr3b transcriptional profiling for P6497 (Real Time RT-PCR)
Avh_307RTR	CTAATTAAACAACAATCGTACTG	Avr3b transcriptional profiling for P6497 (Real Time RT-PCR)
Avh307QRT-F3	GGTCGTAGCGTGGTATGCAATG	Avr3b transcriptional polymorphism for P6497 and P7076 (Real Time RT-PCR)
Avh307QRT-R3	TTCTTCCAGGACCTCACGCTTC	Avr3b transcriptional polymorphism for P6497 and P7076 (Real Time RT-PCR)
Avh307MF	CTGTTTCGACATCGCGAAGC	Avr3b Polymorphism sequencing (PCR for product)
Avh307MR	TCAAGTGAAATCTCTCTATTCC	Avr3b Polymorphism sequencing (PCR for product)
Avh307MFa	CCTAAAGGTCTCAGCGAGAA	Avr3b Polymorphism sequencing (Primers for sequencing)
Avh307MFb	CCTGCAGAGCCATCACAAG	Avr3b Polymorphism sequencing (Primers for sequencing)
PsActin1F	ACTGCACCTTCCAGACCATC	Actin for control (Real Time RT-PCR)
PsActin1R	CCACCACCTTGATCTTCATG	Actin for control (Real Time RT-PCR)
A3b-flag-F	gATGGATTACAAGGATGATGATGATAAGGAGGCTGCTGAATCGGCTG	Avr3b expression in PVX vector plus Flag-tag
A3b-flag-R	aCTAATTAAACAACAATCGTACTG	Avr3b expression in PVX vector
A3b-flag-16-174R	aCTATACCACGCTACGACCG	Avr3b deletion mutant (16-174 a.a.) expression in PVX vector
A3b-flag-170-315F	gATGGATTACAAGGATGATGATGATAAGGGTCGTAGCGTGGTATGCAATG	Avr3b deletion mutant (170-315 a.a.) expression in PVX vector
3bQQQQ-F	CTTATGGGGCGGCGAAGCAACAAGTCCTGCAACAAGGAGGGGTACGGTATCG	Avr3b QQQQ mutant expression in PVX vector
3bQQQQ-R	CGATACCGTACCCCTCCTTGTTGCAGGACTTGTTGCTTCGCCGCCCCATAAG	Avr3b QQQQ mutant expression in PVX vector
NbActF	ACCATCAATGATCGGAATGG	N. benthimiana actin amplication (Real Time PCR for virulence assay)
NbActR	GCTCATCCTATCAGCAATGC	N. benthimiana actin amplication (Real Time PCR for virulence assay)
PcActF	AGGAGATGGCCAAGTTAGC	P. capsici actin amplication (Real Time PCR for virulence assay)
PcActR	CCGACTCATCATACTCGG	P. capsici actin amplication (Real Time PCR for virulence assay)
Avh309RTF	CAAAGTGGCAAGCTTCGTAG	RT-PCR to detect the presence of transcript
Avh309RTR	CAGTTGCTCCCTAGACTTTG	RT-PCR to detect the presence of transcript
Avh308RTF	CAAGGTGAGCGCAATAGACG	RT-PCR to detect the presence of transcript
Avh308RTR	CTAGAGCACAGCTTTCATTTG	RT-PCR to detect the presence of transcript
Avh9RTF	AGCCCACGATAACGGCGCTC	RT-PCR to detect the presence of transcript
Avh9RTR	CACAGGCTTTTTGTCGAGATG	RT-PCR to detect the presence of transcript
Avh198RTF	ATCGAGCGTTTTATTTGTGG	RT-PCR to detect the presence of transcript
Avh198RTR	TAGCCAGGGATTGCCCAGTTG	RT-PCR to detect the presence of transcript
Avh340RTF	ACGAAGAACGATGCGTCTCC	RT-PCR to detect the presence of transcript
Avh340RTR	CTTCGTAATAAGTATTGTACC	RT-PCR to detect the presence of transcript
Avh238RTF	TGCCGAGGCGAAGCTCTTGTC	RT-PCR to detect the presence of transcript
Avh238RTR	CTACACAGGCTTGGCCAACC	RT-PCR to detect the presence of transcript
Avh302RTF	ATGCCTTCGGTCCGAAGAAGC	RT-PCR to detect the presence of transcript
Avh302RTR	TCATTTGCCCTCTTCCACTG	RT-PCR to detect the presence of transcript
AVH307-T7F	GTAATACGACTCACTATAGGGGGGTACGGTATCGTTCAGACAT	P. sojae Avr3b in vitro synthesized dsRNA
AVH307-T7R	GTAATACGACTCACTATAGGGTCGTACTGTTAGCTGCGTTTCC	P. sojae Avr3b in vitro synthesized dsRNA

## Sheet: Fig 1
Protein ID	Name	Solexa	Affymetrix	EST	SignalP HMM	SP Lenth	RXLR	dEER	Function
158991	PsAvh1		+		0.996	21	RSLR	DAGER
158992	PsAvh4		+		0.998	21	RFLR	DVSSSEER
158994	PsAvh6		+	+	0.998	25	RFLR	DNEER
159001	PsAvh13		+		1	21	RLLR	DEEER
159003	PsAvh15	+	+		0.998	23	RLLR	DVADEER
159004	PsAvh16	+	+		1	20	GMLRR	DKINEER
159005	PsAvh17	+			1	24		DEVEEEK
159008	PsAvh20		+		1	21	RLLR	DNEEER
159011	PsAvh23	+	+		0.997	23	RMLR	DHEER
159013	PsAvh25	+	+		1	19	RNLR	DDEDR
159015	PsAvh27	+	+		1	20	RFLR	DGSEER	Avr3c
159017	PsAvh29		+		1	23	RFLR	DEDR
159019	PsAvh31	+			0.985	46	RFLR	DDEEER
159025	PsAvh38	+		+	0.998	26	RSLE	EGEEER
159027	PsAvh40		+		0.999	20	RFLR	DDEER
159029	PsAvh42	+			1	21	RSLR	DEER
159037	PsAvh52		+	+	0.998	21	RLLR	DEQR
159038	PsAvh53		+		0.999	19	RLLR	DEER
159040	PsAvh61	+	+		0.991	20	RALR	DATGEER
159041	PsAvh62			+	1	21	RFLR	DGSEER
159043	PsAvh64	+			1	25	RFLR	DNEER
159046	PsAvh67				1	20	RRLR	DANEEVEER
159050	PsAvh73		+		1	23	RALR	DEER
159053	PsAvh78	+			0.998	27	RFLR	DGEDEER
159055	PsAvh80		+		1	20	TALS	EHDKR
159056	PsAvh81	+	+		0.999	25	RFLR	ESEGDER
159060	PsAvh87	+			0.976	31	RFLR	DEER
159064	PsAvh92	+			0.999	20	RLLR	DSPEDR	Avr3a
159065	PsAvh94	+		+	1	23	RLLR	DVEDR
159066	PsAvh95	+			1	23	RLLR	DVEDR
159068	PsAvh97	+			1	23	RSLR	DEER
159073	PsAvh105	+			1	21	RFLR	DSADEER
159076	PsAvh109		+		0.998	20	TSLR	KGDR
159077	PsAvh110	+	+	+	1	20	RFLR	DEER
159078	PsAvh111	+			1	20	RFLR	DLEGEDR
159079	PsAvh113	+			1	20	RFLR	EER
159080	PsAvh114	+			0.999	23	RHLK	DGEEAR
159081	PsAvh115	+	+		1	20	RHLR	DNDEER
159088	PsAvh125	+			0.983	23	RTLQ	ETEER
159092	PsAvh131	+			1	22	RRLR	DEER
159094	PsAvh137	+	+		1	20	RFLR	ESMTER
159100	PsAvh144	+			1	21	RLLR	DDEER
159101	PsAvh145	+			0.999	23	RLLR	DDEER
159102	PsAvh146	+	+		1	20	RLLR	EDEER
159103	PsAvh147		+		1	19	RFLR	DEDEER
159104	PsAvh148	+			1	23	RLLR	DAEER
159105	PsAvh149	+	+		0.999	22	RLLR	DDEER
159109	PsAvh153	+			1	23	RLLR	EDSEER
159110	PsAvh154	+	+		1	24	RLLR	DDEER
159111	PsAvh155	+			1	26	TKLT	DENDEER
159114	PsAvh158	+	+		0.999	29	RHLR	DGVNSEEK
159119	PsAvh163	+	+		1	23	RMVR	DGDEDR
159120	PsAvh164		+		0.996	28	RHLR	EER
159123	PsAvh167	+			1	17	RNLR	DDEDR
159124	PsAvh168	+			1	23	RVLR	DKENEDR
159127	PsAvh171		+		0.998	25	RYLR	EEEER	Avr4/6
159128	PsAvh172	+	+	+	1	20	RLLR	DNEDR
159129	PsAvh173		+		0.998	24	RYLR	DEEEDEER
159135	PsAvh179	+	+		1	20	PALR	DPAGEAR
159136	PsAvh180		+		1	20	RSLR	DEEER
159137	PsAvh181	+	+		1	20	SSLR	DENDEER
159138	PsAvh182	+			1	24	RRLR	DEDEER
159144	PsAvh188	+			1	21	KNLR	DYGDGER
159146	PsAvh190	+			1	21	RNLR	NEER
159150	PsAvh194	+		+	0.996	23	RSLR	EDESSELR
159152	PsAvh196	+	+	+	1	20	RMLLR	DEEER
159155	PsAvh199	+			1	20	RLLR	DDEER
159168	PsAvh212	+			0.999	21	RMLV	KEER
159171	PsAvh215			+	0.988	28	RHLR	DRDEER
159184	PsAvh228		+		0.999	24	RKLK	EDEER
159185	PsAvh229		+		1	25	RFLR	EEER
159188	PsAvh232		+		0.999	23	RHLR	DEER
159190	PsAvh234		+		1	20	RLLR	DASDEDR
159191	PsAvh235		+		1	22	RLLR	DDDSEER
159192	PsAvh236		+		1	22	RLLR	DDDSEER
159193	PsAvh237		+		1	22	RLLR	DDDSEER
159194	PsAvh238	+	+	+	0.999	19	RFLR	DGKTEER
159195	PsAvh239		+		0.942	19	RLLPR	DDQER
159196	PsAvh240	+	+		1	23	RHLR	DDEDER
159197	PsAvh241	+			1	18	RLLR	DTFEDR
159198	PsAvh242		+		1	23	RHLR	DEER
159199	PsAvh243	+			1	20	RFLR	EER
159202	PsAvh246	+	+		1	24	RHLK	DEEER
159204	PsAvh248	+			1	20	RSLR	DEER
159205	PsAvh249	+			1	21	RSLR	DADEER
159208	PsAvh252	+			1	22	RSLR	DEQR
159212	PsAvh256	+	+		0.931	48	RLLR	DLTEER
159214	PsAvh258	+			1	24	RHLK	DLTAESEER
159216	PsAvh260			+	0.999	24	RRLK	EEER
159217	PsAvh261		+		0.999	24	RHNLK	DSEER
159219	PsAvh263		+		1	21	RSLR	EAEER
159225	PsAvh269	+			1	19	RLLR	EER
159226	PsAvh270	+	+	+	1	17	RLLR	EEEEER
159228	PsAvh272	+			1	20	RLLR	DDEER
159238	PsAvh282	+			0.834	24	RSLR	EER
159239	PsAvh283	+			1	21	RLLQ	DSDER
159240	PsAvh284	+			1	23	RLLR	EDSEER
159244	PsAvh288	+	+	+	0.999	20	RRLK	DLTAHEEER
159246	PsAvh290	+			0.994	24	RSLR	DSSELR
159248	PsAvh292	+			1	24	RSLR	DDEDR
159250	PsAvh294		+		0.992	21	RHLK	DEER
159263	PsAvh307	+			1	17	RSLR	EER
159286	PsAvh330	+			0.818	20	RSLR	DANVSIENR	Avr1k
159287	PsAvh331	+			0.818	20	RSLR	DANVSIENR	Avr1k
159291	PsAvh335		+		0.929	22	RSLR	DKVEK
159296	PsAvh340		+		0.997	20	RQLR	DEER
159302	PsAvh346	+			0.999	24	RALR	EER
159304	PsAvh348	+			0.999	21	RVLK	DTKGDIER
159325	PsAvh370	+			0.999	20	RLLR	DEGDSPEDR
159339	PsAvh416	+			1	23	RVLR	DKENEDR
159340	PsAvh421	+			1	20	RTLR	DDNSEER
159346	PsAvh429	+			0.994	20	RLLS	DESEEER
159357	PsAvh441	+			0.999	24	RFLR
159373	PsAvh457	+			0.995	44	RFLR	DADSEDR
159375	PsAvh459	+	+	+	1	21	RFRR	DDEER
159377	PsAvh461			+	0.999	21	RRLR	EIDR
159378	PsAvh462		+		0.998	24	RFLR	EEGEER
159380	PsAvh464	+			0.999	24	RLLR	DEAR
